# Supplementary material for: Hidden Burden of Electronic Health Record‐Identified Familial Hypercholesterolemia: Clinical Outcomes and Cost of Medical Care
Source: PubMed Central journal article supplement — J Am Heart Assoc. 2019 Jun 29;8(13):e011822. doi: 10.1161/JAHA.118.011822 (PMC6662375; doi:10.1161/jaha.118.011822), 2019-06-29
Supplement: JAH3-8-e011822-s001.pdf [file JAH3-8-e011822-s001.pdf]

# SUPPLEMENTAL MATERIAL

**Table S1. Dutch Lipid Clinic Network diagnostic criteria for familial hypercholesterolemia\*.**

| Supplementary Table S1 : Dutch Lipid Clinic Network diagnostic criteria for familial hypercholesterolemia*                                                                                              |                                                                                                                                                                                  |        |
|---------------------------------------------------------------------------------------------------------------------------------------------------------------------------------------------------------|----------------------------------------------------------------------------------------------------------------------------------------------------------------------------------|--------|
| Criteria                                                                                                                                                                                                |                                                                                                                                                                                  | Points |
| Family history                                                                                                                                                                                          | First-degree relative with known premature (men: <55 years; women: <60 years) coronary and vascular disease, or First-degree relative with known LDLC† above the 95th percentile | 1      |
|                                                                                                                                                                                                         | First-degree relative with tendinous xanthomata and/or arcus cornealis, or Children aged less than 18 years with LDLC above the 95th percentile                                  | 2      |
| Clinical history                                                                                                                                                                                        | Patient with premature (men: <55 years; women: <60 years) coronary artery disease                                                                                                | 2      |
|                                                                                                                                                                                                         | Patient with premature (men: <55 years; women: <60 years) cerebral or peripheral vascular disease                                                                                | 1      |
| Physical examination                                                                                                                                                                                    | Tendinous xanthomata                                                                                                                                                             | 6      |
|                                                                                                                                                                                                         | Arcus cornealis prior to age 45 years                                                                                                                                            | 4      |
| Cholesterol levels (mmol/liter)                                                                                                                                                                         | LDLC, ≥8.5                                                                                                                                                                       | 8      |
|                                                                                                                                                                                                         | LDLC, 6.5–8.4                                                                                                                                                                    | 5      |
|                                                                                                                                                                                                         | LDLC, 5.0–6.4                                                                                                                                                                    | 3      |
|                                                                                                                                                                                                         | LDLC, 4.0–4.9                                                                                                                                                                    | 1      |
| DNA analysis                                                                                                                                                                                            | Functional mutation in the <i>LDLR</i> gene                                                                                                                                      | 8      |
| Diagnosis (diagnosis is based on the total number of points obtained)                                                                                                                                   |                                                                                                                                                                                  |        |
| A “definite” FH† diagnosis requires more than 8 points                                                                                                                                                  |                                                                                                                                                                                  |        |
| A “probable” FH diagnosis requires 6–8 points                                                                                                                                                           |                                                                                                                                                                                  |        |
| A “possible” FH diagnosis requires 3–5 points                                                                                                                                                           |                                                                                                                                                                                  |        |
| * World Health Organization. Familial hypercholesterolemia—report of a second WHO Consultation. Geneva, Switzerland: World Health Organization, 1999. (WHO publication no. WHO/HGN/FH/CONS/99.2). (15). |                                                                                                                                                                                  |        |
| † LDLC, low density lipoprotein cholesterol; FH, familial hypercholesterolemia.                                                                                                                         |                                                                                                                                                                                  |        |

**Table S2. EHR based algorithm based on Dutch Lipid Clinic Network criteria to identify familial hypercholesterolemia.**

| Dutch Lipid Clinic Network Criteria                                                                                | Implementation                                                                                                                                                                                                                                                                                                                                                                                                                                                                                                                                                                                                                                                                                                          |
|--------------------------------------------------------------------------------------------------------------------|-------------------------------------------------------------------------------------------------------------------------------------------------------------------------------------------------------------------------------------------------------------------------------------------------------------------------------------------------------------------------------------------------------------------------------------------------------------------------------------------------------------------------------------------------------------------------------------------------------------------------------------------------------------------------------------------------------------------------|
| First-degree relative with premature coronary and/or vascular disease (men $\leq$ 55 years, women $\leq$ 60 years) | <ul style="list-style-type: none"> <li>- Searched for ‘Heart Disease’ in family history (not limited to first-degree relatives as this information was not always available)</li> <li>- Searched for ‘Family history of premature heart disease’ in problem list</li> </ul>                                                                                                                                                                                                                                                                                                                                                                                                                                             |
| First-degree relative with known LDL-C $\geq$ 95th percentile for age and sex                                      | - Searched for ‘Family history of hyperlipidemia in problem list                                                                                                                                                                                                                                                                                                                                                                                                                                                                                                                                                                                                                                                        |
| First-degree relative with tendon xanthomata and/or arcus cornealis,                                               | - Data unavailable                                                                                                                                                                                                                                                                                                                                                                                                                                                                                                                                                                                                                                                                                                      |
| Children aged $\leq$ 18 years with known LDL-C $\geq$ 95th percentile for age and sex                              | Used known mother/child links (available since 2010) to search for children with LDL $\geq$ 95th percentile (LOINC: 13457-7, 18262-6, 2089-1, 55440-2 and lab result value between 230 and 90000.                                                                                                                                                                                                                                                                                                                                                                                                                                                                                                                       |
| <b>Clinical History</b>                                                                                            |                                                                                                                                                                                                                                                                                                                                                                                                                                                                                                                                                                                                                                                                                                                         |
| Patient with premature coronary artery disease (men $\leq$ 55 years, women $\leq$ 60 years)                        | Used electronic phenotyping to identify patients with premature coronary artery disease. Used P004 to pull these patients. A previously validated algorithm.                                                                                                                                                                                                                                                                                                                                                                                                                                                                                                                                                            |
| Patient with premature cerebral or peripheral vascular disease (men $\leq$ 55 years, women $\leq$ 60 years)        | <p>Searched for ICD9 diagnosis codes in encounters and problem list (PVD: 249.7, 249.70, 249.71, 250.70, 250.71, 250.73, 440.20, 440.21, 440.22, 440.23, 440.24, 443, 443.0, 443.1, 443.2, 443.21, 443.22, 443.23, 443.24, 443.29, 443.8, 443.81, 443.82, 443.89, 443.9, V12.59</p> <p>CVD: 199.1, 436, 437, 437.0, 437.1, 437.8, 437.9, 438, 438.0, 438.1, 438.10, 438.11, 438.12, 438.13, 438.14, 438.19, 438.2, 438.20, 438.21, 438.22, 438.3, 438.30, 438.31, 438.32, 438.4, 438.40, 438.41, 438.42, 438.5, 438.50, 438.51, 438.52, 438.53, 438.6, 438.7, 438.8, 438.81, 438.82, 438.83, 438.84, 438.85, 438.89, 438.9, 674.0, 674.00, 674.02, V12.59) Patients had to have two or more diagnoses in their EHR.</p> |
| <b>Physical Examination</b>                                                                                        |                                                                                                                                                                                                                                                                                                                                                                                                                                                                                                                                                                                                                                                                                                                         |
| Tendon xanthomata                                                                                                  |                                                                                                                                                                                                                                                                                                                                                                                                                                                                                                                                                                                                                                                                                                                         |

|                                                                                     |                                                                                                                                    |
|-------------------------------------------------------------------------------------|------------------------------------------------------------------------------------------------------------------------------------|
|                                                                                     | Searched for ICD9 diagnosis codes in encounters and problem list (272.7). Patients had to have two or more diagnoses in their EHR. |
| Arcus cornealis at age $\leq$ 45 years                                              | Searched for ICD9 diagnosis codes in encounters and problem list (371.41)                                                          |
| LDL-C (mg/dl)                                                                       |                                                                                                                                    |
|                                                                                     | - Used maximum lifetime outpatient LDL-C level                                                                                     |
| LDL-C < 155                                                                         |                                                                                                                                    |
| $155 \geq$ LDL-C < 189                                                              |                                                                                                                                    |
| $190 \geq$ LDL-C < 249                                                              |                                                                                                                                    |
| $250 \geq$ LDL-C < 329                                                              |                                                                                                                                    |
| LDL-C $\geq$ 330                                                                    |                                                                                                                                    |
| DNA Analysis – functional variant in <i>LDLR</i> , <i>APOB</i> or <i>PCSK9</i> gene |                                                                                                                                    |
|                                                                                     | <i>LDLR</i>                                                                                                                        |
|                                                                                     | <i>APOB</i>                                                                                                                        |
|                                                                                     | <i>PCSK9</i>                                                                                                                       |

**Table S3. Count of Patients Meeting Each Definition.**

| <b>Dutch Lipid Clinic Network Criteria</b>                                                                         | <b>Points</b> | <b>Meeting criteria in EHR, N (%)</b> | <b>Not meeting criteria in EHR, N (%)</b> | <b>Implemented using Modified criteria (below)</b>                                                                                                                                                                  |
|--------------------------------------------------------------------------------------------------------------------|---------------|---------------------------------------|-------------------------------------------|---------------------------------------------------------------------------------------------------------------------------------------------------------------------------------------------------------------------|
| First-degree relative with premature coronary and/or vascular disease (men $\leq$ 55 years, women $\leq$ 60 years) | 1             | 108,742 (45.70%)                      | 129,161 (54.29%)                          | Searched for 'Heart Disease' in family history (not limited to first-degree relatives as this information was not always available)<br><br>Searched for 'Family history of premature heart disease' in problem list |
| First-degree relative with known LDL-C $\geq$ 95th percentile for age and sex                                      | 1             | 15 (0.00%)*                           | 237,888 (99.99%)                          | Searched for 'Family history of hyperlipidemia in problem list                                                                                                                                                      |
| First-degree relative with tendon xanthomata and/or arcus cornealis                                                | 2             | N/A                                   | N/A                                       | Data unavailable                                                                                                                                                                                                    |
| Children aged $\leq$ 18 years with known LDL-C $\geq$ 95th percentile for age and sex                              | 2             | 0 (0.00%)*                            | 237,903 (100.00%)                         | Used known mother/child links (available since 2010) to search for children with LDL $\geq$ 95th percentile (LOINC: 13457-7, 18262-6, 2089-1, 55440-2 where lab value between 230 AND 90000)                        |

| Clinical History                                                                                  |   |               |                  |                                                                                                                                                                                                                                                                                                                                                                                                                                                                                                                                                                                                                                                                                                              |
|---------------------------------------------------------------------------------------------------|---|---------------|------------------|--------------------------------------------------------------------------------------------------------------------------------------------------------------------------------------------------------------------------------------------------------------------------------------------------------------------------------------------------------------------------------------------------------------------------------------------------------------------------------------------------------------------------------------------------------------------------------------------------------------------------------------------------------------------------------------------------------------|
| Patient with premature coronary artery disease (men ≤ 55 years, women ≤ 60 years)                 | 2 | 9,809 (4.12%) | 228,094 (95.87%) | Used electronic phenotyping to identify patients with premature coronary artery disease. Used P004 to pull these patients                                                                                                                                                                                                                                                                                                                                                                                                                                                                                                                                                                                    |
| Patient with premature cerebral or peripheral vascular disease (men ≤ 55 years, women ≤ 60 years) | 1 | 2,722 (1.14%) | 235,181 (98.85%) | Searched for ICD9 diagnosis codes in encounters and problem list (PVD: 249.7, 249.70, 249.71, 250.70, 250.71, 250.73, 440.20, 440.21, 440.22, 440.23, 440.24, 443, 443.0, 443.1, 443.2, 443.21, 443.22, 443.23, 443.24, 443.29, 443.8, 443.81, 443.82, 443.89, 443.9, V12.59<br>CVD: 199.1, 436, 437, 437.0, 437.1, 437.8, 437.9, 438, 438.0, 438.1, 438.10, 438.11, 438.12, 438.13, 438.14, 438.19, 438.2, 438.20, 438.21, 438.22, 438.3, 438.30, 438.31, 438.32, 438.4, 438.40, 438.41, 438.42, 438.5, 438.50, 438.51, 438.52, 438.53, 438.6, 438.7, 438.8, 438.81, 438.82, 438.83, 438.84, 438.85, 438.89, 438.9, 674.0, 674.00, 674.02, V12.59) Patients had to have two or more diagnoses in their EHR. |

| Physical Examination                   |   |                  |                  |                                                                                                                                     |
|----------------------------------------|---|------------------|------------------|-------------------------------------------------------------------------------------------------------------------------------------|
| Tendon xanthomata                      | 6 | 27 (0.00%)*      | 237,876 (99.99%) | Searched for ICD9 diagnosis codes in encounters and problem list (272.7). Patients had to have two or more diagnoses in their EHR.  |
| Arcus cornealis at age $\leq$ 45 years | 4 | 1 (0.00%)*       | 237,902 (99.99%) | Searched for ICD9 diagnosis codes in encounters and problem list (371.41). Patients had to have two or more diagnoses in their EHR. |
| LDL-C (mg/dl)                          |   |                  |                  |                                                                                                                                     |
| None recorded                          | - | 9,573 (4.02%)    | -                | Used maximum lifetime outpatient LDL-C level (LOINC 13457-7, 18262-6, 2089-1, 55440-2)                                              |
| LDL-C < 155                            | 0 | 138,351 (58.12%) | -                |                                                                                                                                     |
| 155 $\geq$ LDL-C < 189                 | 1 | 61,955(26.04%)   | -                |                                                                                                                                     |
| 190 $\geq$ LDL-C < 249                 | 3 | 25,494 (10.72%)  | -                |                                                                                                                                     |
| 250 $\geq$ LDL-C < 329                 | 5 | 2,178 (0.92%)    | -                |                                                                                                                                     |

|                                                                                                                                                                     |   |             |   |  |
|---------------------------------------------------------------------------------------------------------------------------------------------------------------------|---|-------------|---|--|
| LDL-C $\geq$ 330                                                                                                                                                    | 8 | 352 (0.15%) | - |  |
| DNA Analysis – functional variant in <i>LDLR</i> , <i>APOB</i> or <i>PCSK9</i> gene (variant data was not available for the entire cohort so %s are not presented). |   |             |   |  |
| <i>LDLR</i>                                                                                                                                                         | 8 | 85          | - |  |
| <i>APOB</i>                                                                                                                                                         | 8 | 76          | - |  |
| <i>PCSK9</i>                                                                                                                                                        | 8 | 19          | - |  |



**Table S4. PPV, NPV, Sensitivity and Specificity to Definitions.**

|                      |                                                                                                                                          |              |             |         |
|----------------------|------------------------------------------------------------------------------------------------------------------------------------------|--------------|-------------|---------|
| <b>Definition 1</b>  | <b>Family history of heart disease</b>                                                                                                   |              | Sensitivity | 92.37%  |
|                      | <b>Def1+</b>                                                                                                                             | <b>Def1-</b> | Specificity | 98.32%  |
| <b>Def1+</b>         | 121                                                                                                                                      | 2            | PPV         | 98.37%  |
| <b>Def1-</b>         | 10                                                                                                                                       | 117          | NPV         | 92.13%  |
|                      | 131                                                                                                                                      | 119          | Accuracy    | 95.20%  |
|                      | 250                                                                                                                                      |              |             |         |
| <b>Definition 2*</b> | <b>First-degree relative with known LDL-C <math>\geq</math> 95th percentile for age and sex</b>                                          |              | Sensitivity | 0.00%   |
|                      | <b>Def2+</b>                                                                                                                             | <b>Def2-</b> | Specificity | 100.00% |
| <b>Def2+</b>         | 0                                                                                                                                        | 0            | PPV         | N/A     |
| <b>Def2-</b>         | 2                                                                                                                                        | 248          | NPV         | 99.20%  |
|                      | 2                                                                                                                                        | 248          | Accuracy    | 99.20%  |
|                      | 250                                                                                                                                      |              |             |         |
| <b>Definition 5</b>  | <b>Patient with premature coronary artery disease (men <math>\leq</math> 55 years, women <math>\leq</math> 60 years)</b>                 |              | Sensitivity | 93.94%  |
|                      | <b>Def5+</b>                                                                                                                             | <b>Def5-</b> | Specificity | 99.54%  |
| <b>Def5+</b>         | 31                                                                                                                                       | 1            | PPV         | 96.88%  |
| <b>Def5-</b>         | 2                                                                                                                                        | 216          | NPV         | 99.08%  |
|                      | 33                                                                                                                                       | 217          | Accuracy    | 98.80%  |
|                      | 250                                                                                                                                      |              |             |         |
| <b>Definition 6</b>  | <b>Patient with premature cerebral or peripheral vascular disease (men <math>\leq</math> 55 years, women <math>\leq</math> 60 years)</b> |              | Sensitivity | 92.86%  |
|                      | <b>Def6+</b>                                                                                                                             | <b>Def6-</b> | Specificity | 100.00% |
| <b>Def6+</b>         | 13                                                                                                                                       | 0            | PPV         | 100.00% |
| <b>Def6-</b>         | 1                                                                                                                                        | 236          | NPV         | 99.58%  |
|                      | 14                                                                                                                                       | 236          | Accuracy    | 99.60%  |
|                      | 250                                                                                                                                      |              |             |         |

\*analysis affected by unavailable data in the EHR for this field so modified criteria (Definition 1) was used

**Table S5. PPV, NPV, Sensitivity and Specificity by FH Category.**

| Broken Down by Groups and Over All |                    |     |     |     |  |             |         |
|------------------------------------|--------------------|-----|-----|-----|--|-------------|---------|
| <b>Unlikely+</b>                   | <b>Unlikely+</b>   | 118 | 0   |     |  | Sensitivity | 95.16%  |
|                                    | <b>Unlikely-</b>   | 6   | 126 |     |  | Specificity | 100.00% |
|                                    |                    | 124 | 126 | 250 |  | PPV         | 100.00% |
|                                    |                    |     |     |     |  | NPV         | 95.45%  |
|                                    |                    |     |     |     |  | Accuracy    | 97.60%  |
| <hr/>                              |                    |     |     |     |  |             |         |
| <b>Possible+</b>                   | <b>Possible+</b>   | 110 | 1   |     |  | Sensitivity | 100.00% |
|                                    | <b>Possible-</b>   | 0   | 139 |     |  | Specificity | 99.29%  |
|                                    |                    | 110 | 140 | 250 |  | PPV         | 99.10%  |
|                                    |                    |     |     |     |  | NPV         | 100.00% |
|                                    |                    |     |     |     |  | Accuracy    | 99.60%  |
| <hr/>                              |                    |     |     |     |  |             |         |
| <b>Probable+</b>                   | <b>Probable+</b>   | 13  | 0   |     |  | Sensitivity | 100.00% |
|                                    | <b>Probable-</b>   | 0   | 237 |     |  | Specificity | 100.00% |
|                                    |                    | 13  | 237 | 250 |  | PPV         | 100.00% |
|                                    |                    |     |     |     |  | NPV         | 100.00% |
|                                    |                    |     |     |     |  | Accuracy    | 100.00% |
| <hr/>                              |                    |     |     |     |  |             |         |
| <b>Definitive+</b>                 | <b>Definitive+</b> | 2   | 0   |     |  | Sensitivity | 100.00% |
|                                    | <b>Definitive-</b> | 0   | 248 |     |  | Specificity | 100.00% |
|                                    |                    | 2   | 248 | 250 |  | PPV         | 100.00% |
|                                    |                    |     |     |     |  | NPV         | 100.00% |
|                                    |                    |     |     |     |  | Accuracy    | 100.00% |
| <hr/>                              |                    |     |     |     |  |             |         |
| <b>FH All+</b>                     | <b>FH All+</b>     | 125 | 1   |     |  | Sensitivity | 95.42%  |
|                                    | <b>FH All-</b>     | 6   | 118 |     |  | Specificity | 99.16%  |
|                                    |                    | 131 | 119 | 250 |  | PPV         | 99.21%  |
|                                    |                    |     |     |     |  | NPV         | 95.16%  |
|                                    |                    |     |     |     |  | Accuracy    | 97.20%  |



















**Table S7. International Classification of Disease-9 codes used to identify the outcomes.**

| Diagnosis             | ICD 9 Codes                                                                                                                                                                                                                                                                                                                        |
|-----------------------|------------------------------------------------------------------------------------------------------------------------------------------------------------------------------------------------------------------------------------------------------------------------------------------------------------------------------------|
| Myocardial Infarction | 410.00, 410.0, 410.01, 410.02, 410.1, 410.10, 410.11, 410.12, 410.20, 410.2, 410.21, 410.22, 410.30, 410.31, 410.32, 410.40, 410.4, 410.41, 410.42, 410.50, 410.51, 410.52, 410.60, 410.61, 410.62, 410.7, 410.70, 410.71, 410.72, 410.8, 410.80, 410.81, 410.82, 410.9, 410.90, 410.91, 410.92, 411.0, 412, 429.7, 429.71, 429.79 |
| Heart Failure         | 398.91, 428.0, 428, 428.1, 428.20, 428.2, 428.21, 428.22, 428.23, 428.3, 428.30, 428.31, 428.32, 428.33, 428.40, 428.4, 428.41, 428.42, 428.43, 428.9                                                                                                                                                                              |
| Ischemic Stroke       | 433.01, 433.11, 433.21, 433.31, 433.81, 433.91, 434.01, 434.11, 434.91                                                                                                                                                                                                                                                             |
| PCI                   | 00.66, 17.55, 36.02, 36.03, 36.04, 36.05, 36.06, 36.07, 36.09, 36.01, C9600, C9601, C9602, C9604, C9605, C9606, C9607, G0290                                                                                                                                                                                                       |
| CABG                  | 36.10, 36.11, 36.12, 36.13, 36.14, 36.15, 36.16, 36.19                                                                                                                                                                                                                                                                             |
| ICD                   | 89.49, 37.94, 37.95, 37.96, 37.97, 37.98, C1721, C1722, C1777, C1882, C1895, C1896                                                                                                                                                                                                                                                 |

**Table S8. Cost Analysis -DEFINITIVE and PROBABLE categories combined as FH and compared to UNLIKELY (POSSIBLE excluded).**

|                                    | FH     |       | Non-FH |       | P-value |
|------------------------------------|--------|-------|--------|-------|---------|
|                                    | Median | IQR   | Median | IQR   |         |
| Total adjusted Revenue (2005-2015) | 16425  | 41595 | 11153  | 30844 | <0.0001 |
|                                    | FH     |       | Non-FH |       |         |
| Med Net Revenue                    | Median | IQR   | Median | IQR   | p-value |
| 2014                               | 1007   | 2586  | 860    | 2152  | <0.0001 |
| 2015                               | 1065   | 2709  | 850    | 2123  | <0.0001 |

**Table S9. Cost Analysis - DEFINITIVE and PROBABLE combined as FH and compared to UNLIKELY and POSSIBLE (combined as Non-FH).**

|                                    | FH     |       | Non-FH |       | P-value |
|------------------------------------|--------|-------|--------|-------|---------|
|                                    | Median | IQR   | Median | IQR   |         |
| Total adjusted Revenue (2005-2015) | 16425  | 41595 | 11252  | 31198 | <0.0001 |
|                                    | FH     |       | Non-FH |       |         |
| Med Net Revenue                    | Median | IQR   | Median | IQR   | p-value |
| 2014                               | 1007   | 2586  | 864    | 2171  | <0.0001 |
| 2015                               | 1065   | 2709  | 854    | 2141  | <0.0001 |
